# Supplementary material for: Insertion of double bond π-bridges of A–D–A acceptors for high performance near-infrared polymer solar cells
Source: Royal Society of Chemistry journal article supplement (doi:10.1039/c7ta07049g), 2017-01-01
Supplement: c7ta07049g1.pdf [file c7ta07049g1.pdf]

## Electronic Supplementary Information

### Insertion of double bond $\pi$ -bridges of A-D-A acceptor for high performance near-infrared polymer solar cells

Xiaojun Li,<sup>a,b</sup> Tinghai Yan,<sup>a,b</sup> Haijun Bin,<sup>a,b</sup> Guangchao Han,<sup>a,b</sup> Lingwei Xue,<sup>a</sup> Feng Liu,<sup>c,\*</sup> Yuanping Yi,<sup>a</sup> Zhi-Guo Zhang,<sup>a,\*</sup> Thomas P. Russell,<sup>e</sup> Yongfang Li<sup>a,b,d,\*</sup>

<sup>a</sup> CAS Research/Education Center for Excellence in Molecular Sciences, CAS Key Laboratory of Organic Solids, Institute of Chemistry, Chinese Academy of Sciences, Beijing 100190, China;

<sup>b</sup> School of Chemistry and Chemical Engineering, University of Chinese Academy of Sciences, Beijing 100049, China;

<sup>c</sup> Department of Physics and Astronomy and Collaborative Innovation Center of IFSA (CICIFSA) Shanghai Jiaotong University, Shanghai 200240, China;

<sup>d</sup> Laboratory of Advanced Optoelectronic Materials, College of Chemistry, Chemical Engineering and Materials Science, Soochow University, Suzhou, Jiangsu 215123, China.

<sup>e</sup> Department of Polymer Science and Engineering, University of Massachusetts, Amherst, MA, 01003, USA

E-mail: [liyf@iccas.ac.cn](mailto:liyf@iccas.ac.cn) (Y. F. Li), [iampfengliu@gmail.com](mailto:iampfengliu@gmail.com) (F. Liu)  
[zgzhangwhu@iccas.ac.cn](mailto:zgzhangwhu@iccas.ac.cn) (Z.G. Zhang)

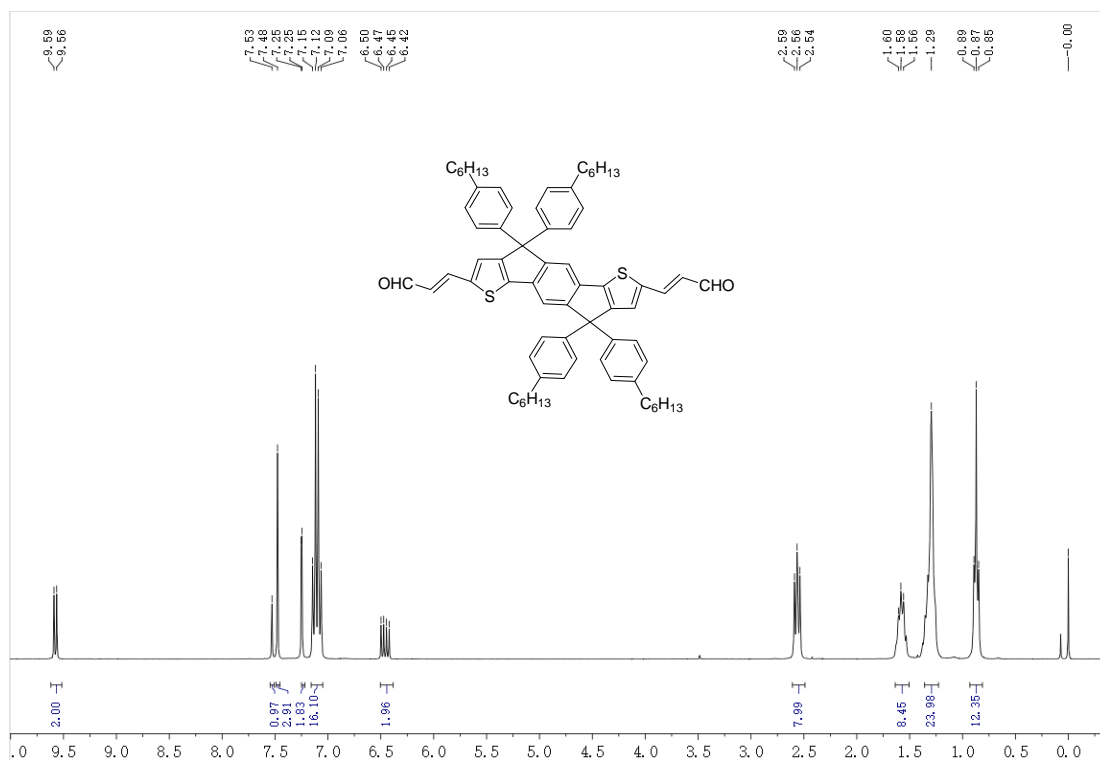

Figure S1.  $^1\text{H-NMR}$  spectrum of SJ-CHO

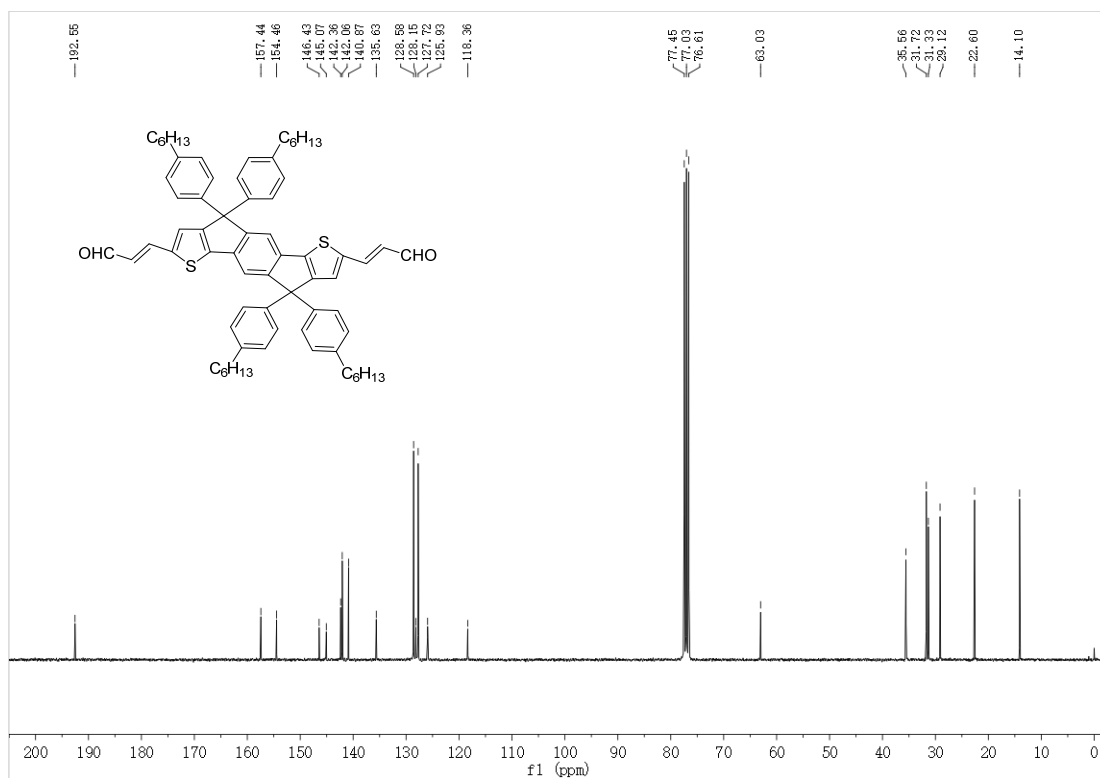

Figure S2.  $^{13}\text{C-NMR}$  spectrum of SJ-CHO

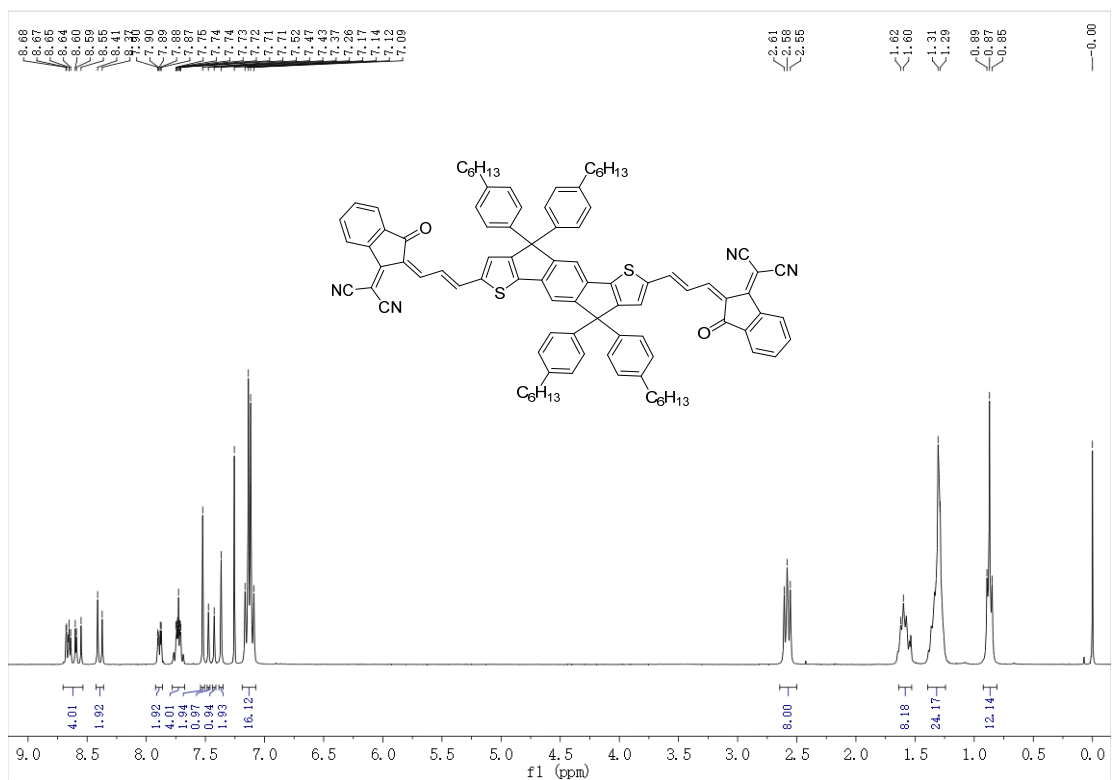

Figure S3.  $^1\text{H-NMR}$  spectrum of SJ-IC

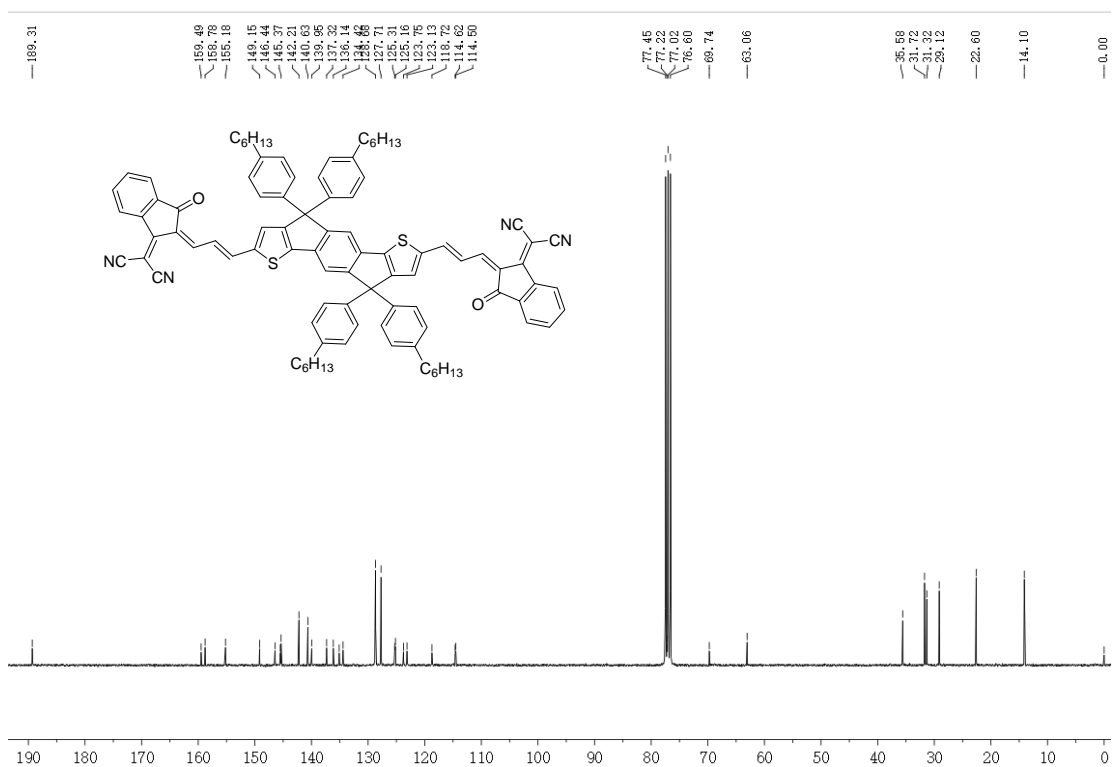

Figure S4.  $^{13}\text{C-NMR}$  spectrum of SJ-IC

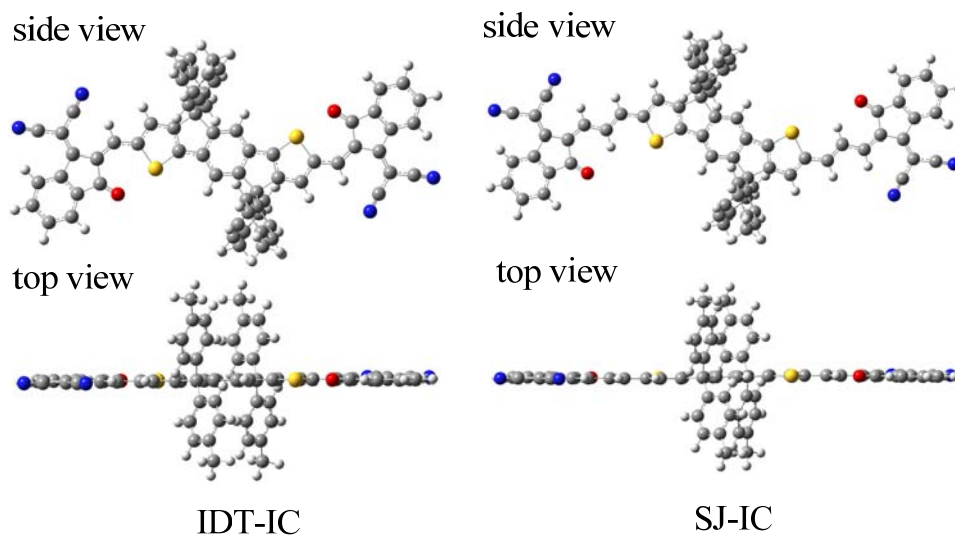

**Figure S5.** Simulated molecular geometries obtained by DFT calculations for simplified molecules of IDT-IC and SJ-IC

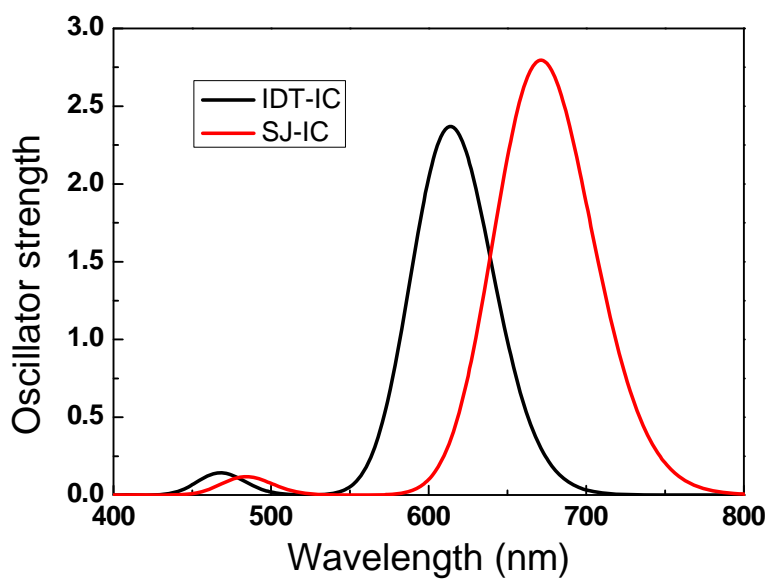

**Figure S6.** Absorption spectra of IDT-IC and SJ-IC calculated with density functional theory at the B3LYP/6-31G(d, p) level

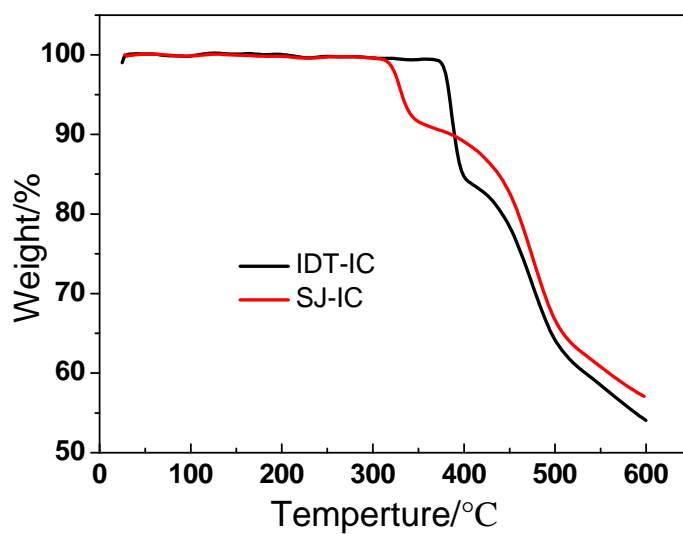

**Figure S7.**TGA plot of IDT-IC and SJ-IC

**Table S1.** Photovoltaic performance data of the PSCs based on J61: SJ-IC with different D:A weight ratio and annealing temperature under illumination of AM 1.5 G,  $100 \text{ mW cm}^{-2}$ .

| D:A<br>(w:w) | Annealing<br>temperature(°C) | $V_{oc}$<br>(V) | $J_{sc}$<br>( $\text{mA cm}^{-2}$ ) | FF<br>(%) | PCE<br>(%) |
|--------------|------------------------------|-----------------|-------------------------------------|-----------|------------|
| 1:0.8        | none                         | 0.85            | 15.18                               | 55.09     | 7.11       |
| 1:1          | none                         | 0.85            | 16.12                               | 54.44     | 7.48       |
| 0.8:1        | none                         | 0.84            | 15.61                               | 53.32     | 7.05       |
| 1:0.8        | 160                          | 0.83            | 16.89                               | 64.39     | 9.04       |
| 1:1          | 160                          | 0.83            | 16.99                               | 65.95     | 9.27       |
| 0.8:1        | 160                          | 0.82            | 16.85                               | 66.02     | 9.21       |

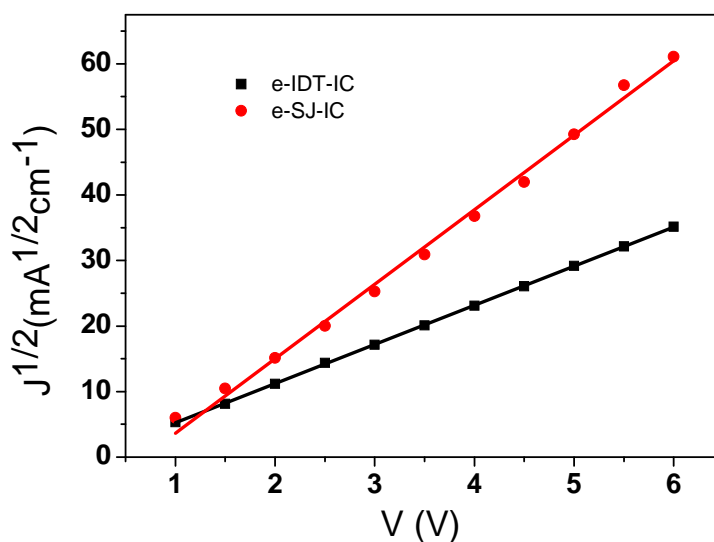

**Figure S8.**  $J^{1/2} \sim (V_{\text{appl}} - V_{\text{bi}} - V_s)$  characteristics for the IDT-IC and SJ-IC-based electron-only device. Solid lines are the fitting lines of the data.

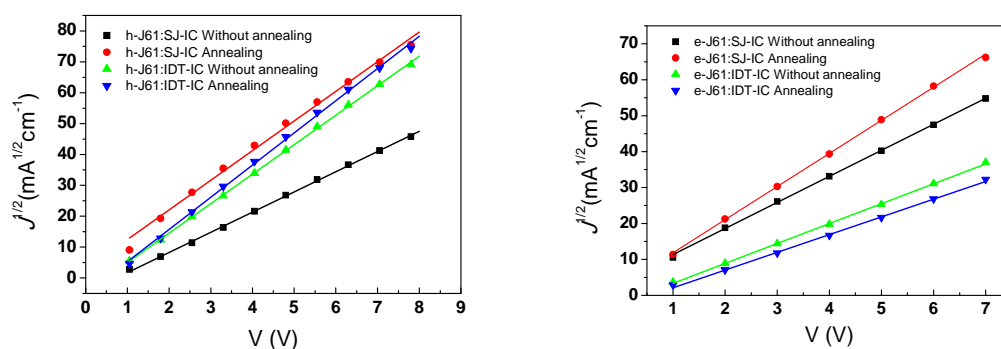

**Figure S9.**  $J^{1/2} \sim (V_{\text{appl}} - V_{\text{bi}} - V_s)$  characteristics for the PSCs based on the blend films of J61:IDT-IC and J61: SJ-IC; (a) hole-only device, (b) electron-only device. Solid lines are the fitting lines of the data.

## References

- (a) P. W. M. Blom, M. J. M. de Jong and M. G. van Munster, *Phys. Rev. B* 1997, **55**, R656; (b) G. G. Malliaras, J. R. Salem and P. J. Brock, C. Scott, *Phys. Rev. B* 1998, **58**, R13411.
- H. J. Bin, Z. G. Zhang, L. Gao, S. S. Chen, L. Zhong, L. W. Xue and Y. F. Li, *J. Am. Chem. Soc.* 2016, **138**, 4657.
